# Supplementary material
Source: Springer Nature journal article supplement (https://www.springermedizin.de/resource/supplementary/12936_2009_944_MOESM3_ESM.pdf/9548590)

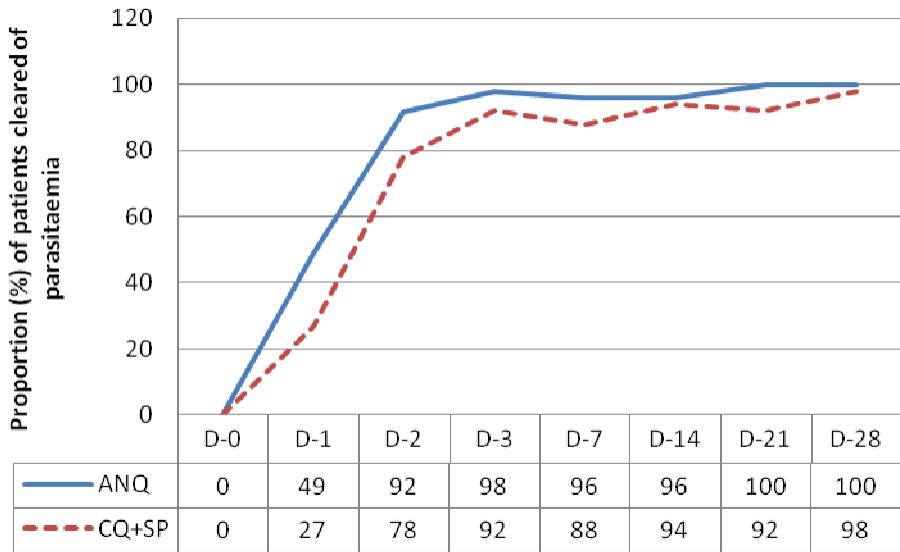

Supplement: MOESM3 [file 9548590]
